# Supplementary material for: Structural Variation of Plastomes Provides Key Insight Into the Deep Phylogeny of Ferns
Source: Front Plant Sci. 2022 May 2;13:862772. doi: 10.3389/fpls.2022.862772 (PMC9134734; doi:10.3389/fpls.2022.862772)
Supplement: Supplementary file 3 [file Table_1.XLSX]

## Sheet: Table S1 new plastomes
Family	Species name	Voucher information	Everage coverage (x)	Size (bp)	GC %	GenBank accession No.
Anemiaceae	Anemia adiantifolia (L.) Sw.	Gabriel A 10100 (MO)	110.505	162177	0.404	OM419342
Aspleniaceae	Asplenium paucivenosum (Ching) Bir	Wei Q et al. WQ417 (KUN)	469.152	151688	0.407	OM419382
Aspleniaceae	Asplenium wrightii Eaton ex Hook.	Wei Q et al. FB843 (KUN)	143.865	152418	0.411	OM419360
Aspleniaceae	Asplenium yoshinagae Makino	Cheng X et al. FB191 (KUN)	88.821	186828	0.404	OM419356
Hymenophyllaceae	Callistopteris apiifolia (C. Presl) Copel.	Wei Q et al. FB792 (KUN)	89.8635	145937	0.377	OM419359
Hymenophyllaceae	Cephalomanes javanicum (Blume) Bosch	Wei Q et al. FB802 (KUN)	356.201	145983	0.376	OM419357
Dipteridaceae	Cheiropleuria bicuspis (Blume) C. Presl	Chen C-W Wade3981 (TAIF)	102.582	160237	0.458	OM419348
Hymenophyllaceae	Crepidomanes latealatum (Bosch) Copel.	Cheng X et al. FB547 (KUN)	217.382	148917	0.377	OM419367
Culcitaceae	Culcita coniifolia (Hook.) Maxon	Fuentes AF & Quispe J 13968 (MO)	64.8018	155,379*	0.423	OM419350
Gleicheniaceae	Dicranopteris ampla Ching & P.S. Chiu	Wei Q et al. FB304 (KUN)	133.44	149024	0.415	OM419352
Gleicheniaceae	Dicranopteris pedata (Houtt.) Nakaike	Cheng X et al. FB095 (KUN)	256.247	148411	0.414	OM419363
Gleicheniaceae	Diplopterygium blotianum (C. Chr.) Nakai	Wei Q et al. FB698 (KUN)	334.768	150647	0.4	OM419345
Gleicheniaceae	Diplopterygium glaucum (Thunb. ex Houtt.) Nakai	Wei Q et al. FB308 (KUN)	612.031	150383	0.401	OM419358
Gleicheniaceae	Diplopterygium laevissimum (H. Christ) Nakai	Cheng X et al. FB134 (KUN)	504.236	147485	0.404	OM419370
Gleicheniaceae	Diplopterygium rufopilosum (Ching & P.S. Chiu) Ching ex X.C. Zhang	Wei Q et al. WQ400 (KUN)	275.22	150824	0.402	OM419364
Dipteridaceae	Dipteris wallichii (R. Br.) T. Moore	Zuo ZY et al. Zuo2692 (KUN)	41.8	161342	0.448	OM419347
Aspleniaceae	Hymenasplenium obscurum (Blume) Tagawa	Cheng X et al. FB051 (KUN)	62.55	158136	0.422	OM419355
Hymenophyllaceae	Hymenophyllum aff. dependens C.V. Morton	Kuo L-Y Kuo4443 (TAIF)	96.4104	147039	0.372	OM419371
Hymenophyllaceae	Hymenophyllum badium Hook. & Grev.	Cheng X et al. FB501 (KUN)	146.909	142805	0.377	OM419373
Hymenophyllaceae	Hymenophyllum barbatum (Bosch) Baker	Wei Q et al. FB724 (KUN)	407.909	139853	0.372	OM419349
Hymenophyllaceae	Hymenophyllum crassipetiolatum Stolze	Forther H 10133 (MO)	25.9	146011	0.374	OM419354
Hymenophyllaceae	Hymenophyllum pallidum Ebihara & K.Iwats.	Kuo L-Y Kuo2605 (TAIF)	234.312	155344	0.382	OM419369
Hymenophyllaceae	Hymenophyllum polyanthos Bosch	Cheng X et al. FB580 (KUN)	182.02	149168	0.375	OM419374
Hymenophyllaceae	Hymenophyllum sibthorpioides (Willd.) Kuhn	Peris Kamau 419 (MO)	103.499	147388	0.384	OM419366
Loxsomataceae	Loxsomopsis pearcei (Baker) Maxon	Rojas A 8678 (MO)	87.987	161,598*	0.427	OM419343
Lygodiaceae	Lygodium japonicum (Thunb.) Sw.	Wei Q et al. FB276 (KUN)	116.76	157152	0.406	OM419353
Lygodiaceae	Lygodium microphyllum (Cav.) R. Br.	Wei Q et al. FB805 (KUN)	315.5	162914	0.409	OM419365
Matoniaceae	Matonia pectinata R. Br.	Chen C-W Wade4862 (TAIF)	648.42	172,311*	0.412	OM419375
Metaxyaceae	Metaxya rostrata (Kunth) C. Presl	Gonzalez S 1698 (MO)	41.5	153,997*	0.396	OM419378
Osmundaceae	Osmunda japonica Thunb.	Lu JM et al. Lu598 (KUN)	101.956	143228	0.405	OM419346
Osmundaceae	Osmundastrum cinnamomeum (L.) C. Presl	Lu JM et al. Lu626 (KUN)	155.3	142908	0.402	OM419368
Marsileaceae	Pilularia americana A. Braun	Mckenzie PM 2312 (MO)	465.163	153,039*	0.407	OM419341
Marattiaceae	Ptisana fraxinea (Sm.) Murdock	Ehoarn B 1616 (MO)	114.633	153026	0.35	OM419377
Polypodiaceae	Selliguea chrysotricha (C. Chr.) Fraser-Jenk.	Wei Q et al. WQ414 (KUN)	600.48	160779	0.407	OM419376
Polypodiaceae	Selliguea ebenipes S.Linds.	Cheng X et al. FB184 (KUN)	170.386	173828	0.405	OM419351
Polypodiaceae	Selliguea hastata (Thunb.) H. Ohashi & K. Ohashi	Lu JM et al. Lu642 (KUN)	61.716	164718	0.408	OM419379
Gleicheniaceae	Sticherus truncatus (Willd.) Nakai	Wei Q et al. FB735 (KUN)	494.02	147907	0.421	OM419380
Gleicheniaceae	Stromatopteris moniliformis Mett.	Weff Han Van der & Mcpherson G 16089 (MO)	87.2781	143209	0.434	OM419372
Lindsaeaceae	Tapeinidium gracile (Blume) v.A.v.R.	Averyamov L et al. 4367 (MO)	61.8411	147,284*	0.401	OM419362
Thyrsopteridaceae	Thyrsopteris elegans Kunze	Ma H et al. HM1380 (FUS)	57.129	156,650*	0.412	OM419361
Hymenophyllaceae	Trichomanes siamense Christ	Wei Q et al. FB797 (KUN)	161.671	153999	0.378	OM419381
Hymenophyllaceae	Vandenboschia auriculata (Blume) Copel.	Cheng X et al. FB118 (KUN)	91.3647	147671	0.374	OM419344
Note: asterisk "*" indicate plastomes with small gaps.
