# Supplementary material for: Structural Variation of Plastomes Provides Key Insight Into the Deep Phylogeny of Ferns
Source: Front Plant Sci. 2022 May 2;13:862772. doi: 10.3389/fpls.2022.862772 (PMC9134734; doi:10.3389/fpls.2022.862772)
Supplement: Supplementary file 4 [file Table_2.XLSX]

## Sheet: 工作表1
Name	Target region	Target taxa	Sequence (5'-3')
Cb clpP Forward	clpP	Cheiropleuria_bicuspis_Wade3981	GGCGGGTGAATGTATTATGG
Cb rps12 Reverse	rps12	Cheiropleuria_bicuspis_Wade3981	CCAATCTCCATCGGTTGTCT
Cb petL Forward	petL	Cheiropleuria_bicuspis_Wade3981	GGAAGAGCGAGGTGACTCAG
Cb psbE Reverse	LSC region	Cheiropleuria_bicuspis_Wade3981	GAACTCGTGGGAACCTGGTA
Cb atpl Forward	atpl	Cheiropleuria_bicuspis_Wade3981	CCACCTAGTTTCCGACTCTT
Cb atpH Reverse	atpH	Cheiropleuria_bicuspis_Wade3981	AGCAATAACAGAAGCAGCAG
Cb trnl-GAU Reverse	trnl-GAU	Cheiropleuria_bicuspis_Wade3981	GGGATCACCCTTCTCATTCT
Cb trnl-GAU Forward	trnl-GAU	Cheiropleuria_bicuspis_Wade3981	TAGCTCAACCCTGGACACTC
Mp trnc-GCA Forward	LSC region (near trnc-GCA gene)	Matonia_pectinata_Wade4862	GATAGGAAACGGATCCTCGT
Mp trnV-UAC Reverse	trnV-UAC	Matonia_pectinata_Wade4862	TTGATAAGAGAGCCCAATGC
Mp rbcl Forward	rbcL	Matonia_pectinata_Wade4862	GTATCCATTTCCGCGTATTG
Mp accD Reverse	LSC region (near accD gene)	Matonia_pectinata_Wade4862	TTTCCTCGCCTATCTCCTCT
Mp accD Forward	accD	Matonia_pectinata_Wade4862	TGCTGAGTCCAAAGCATACA
Mp LSC region Reverse	LSC region (near psaI gene)	Matonia_pectinata_Wade4862	TCTTACCGATAGCTGGCAAC
Mp LSC region Forward	LSC region	Matonia_pectinata_Wade4862	CCCTACATCGGATTTCTCCT
Mp psbB Reverse	psbB	Matonia_pectinata_Wade4862	ATATCCCTGATCCCATTGGT
Mp IR region Forward	IR region	Matonia_pectinata_Wade4862	AGCTCTTTCCCTGTCCAGTT
Mp ndhF Reverse	IR region (near ndhF gene)	Matonia_pectinata_Wade4862	GGTGGATCAATACGCATCTC
Mp trnl-GAU Forward	trnl-GAU	Matonia_pectinata_Wade4862	CTGTTCGGAATACCTGATGG
Mp trnl-GAU Reverse	trnl-GAU	Matonia_pectinata_Wade4862	TTAGCATGGCGTACTCTTCC
Mp trns-GCT Forward	LSC region (near trns-GCT gene)	Matonia_pectinata_Wade4862	CCATCTCTCCAAGCAGGATA
Mp psaM Reverse	psaM	Matonia_pectinata_Wade4862	TAGTGCCGCCCTAACAAGTA
Mp psbM Forward	LSC region (near petN gene)	Matonia_pectinata_Wade4862	TCCTCCCCGATTTAGATTTC
Mp petN Reverse	LSC region (near psbl gene)	Matonia_pectinata_Wade4862	CTACTTCTCGGTTGGCGTAA
Mp ycf12 R	ycf12	Matonia_pectinata_Wade4862	ACAGATTCCCCTTCCGAGTC
Sm ycf2 F	ycf2	Stromatopteris_moniliformis_St48	CACGCAAGGAAACGGTTATT
Sm rps12 R	rps12	Stromatopteris_moniliformis_St48	GCCCCTTCTTACGATCCTTC
Sm LSC region R	LSC region	Stromatopteris_moniliformis_St48	GTGGCTATGAATTGGCAAAC
Sm LSC region F2	LSC region	Stromatopteris_moniliformis_St48	TGAGAAGTTTCACGTTCGAG
Sm LSC region F2	LSC region	Stromatopteris_moniliformis_St48	TGAGAAGTTTCACGTTCGAG
