# Supplementary material for: Structural Variation of Plastomes Provides Key Insight Into the Deep Phylogeny of Ferns
Source: Front Plant Sci. 2022 May 2;13:862772. doi: 10.3389/fpls.2022.862772 (PMC9134734; doi:10.3389/fpls.2022.862772)
Supplement: Supplementary file 5 [file Table_3.XLSX]

## Sheet: trnL-UAA-->CAA
Sequence Name	tRNA Type	Anticodon	Infernal Score	Isotype Model	Isotype Score	Note
Angiopteris_angustifolia_NC026300_trnL-UAA_tRNA	Leu	TAA	68.1	Leu	89.5	None
Botrychium_sp_KM817789_trnL-UAA_tRNA	Leu	TAA	69.6	Leu	88.1	None
Equisetum_arvense_NC014699_trnL-UAA_tRNA	Leu	TAA	67.7	Leu	90.2	None
Mankyua_chejuensis_NC017006_trnL-UAA_tRNA	Leu	TAA	69.6	Leu	84.4	None
Ophioglossum_californicum_NC020147_trnL-UAA_tRNA	Leu	TAA	61.3	Leu	80.1	None
Osmunda_japonicaLu5986_trnL-UAA_tRNA	Leu	TAA	67.5	Leu	86.4	None
Psilotum_nudum_NC003386_trnL-UAA_tRNA	Leu	TAA	68.6	Leu	81.1	None
Tmesipteris_elongata_KJ569699_trnL-UAA_tRNA	Leu	TAA	69.1	Leu	84.1	None
Acrostichum_aureum_MT130571_trnL-CAA_tRNA	Leu	CAA	61.3	Leu	79.5	None
Adiantum_sinicum_MT130585_trnL-CAA_tRNA	Leu	CAA	61.7	Leu	82.3	None
Aleuritopteris_grevilleoides_MT130598_trnL-CAA_tRNA	Leu	CAA	61.2	Leu	79	None
Alsophila_costularis_NC044080_trnL-CAA_tRNA	Leu	CAA	69.4	Leu	89.5	None
Anogramma_microphylla_MT130693_trnL-CAA_tRNA	Leu	CAA	62	Leu	84.8	None
Blotiella_coursii_MT130655_trnL-CAA_tRNA	Leu	CAA	60.3	Leu	77.6	None
Calciphilopteris_ludens_MT130590_trnL-CAA_tRNA	Leu	CAA	60.8	Leu	82	None
Ceratopteris_pteridoides_MT130583_trnL-CAA_tRNA	Leu	CAA	60.6	Leu	82.3	None
Cibotium_barometz_MT130589_trnL-CAA_tRNA	Leu	CAA	61.4	Leu	81.5	None
Coniogramme_petelotii_MT130619_trnL-CAA_tRNA	Leu	CAA	63.4	Leu	81.2	None
Culcita_coniifolia_Cu06__trnL-CAA_tRNA	Leu	CAA	69.4	Leu	89.5	None
Cyathea_lepifera_MN623357_trnL-CAA_tRNA	Leu	CAA	69.4	Leu	89.5	None
Cystodium_sorbifolium_MT130630_-_trnL-CAA_tRNA	Leu	CAA	59.3	Leu	82.3	None
Dennstaedtia_scabra_MT130669_trnL-CAA_tRNA	Leu	CAA	63.7	Leu	84.7	None
Dicksonia_squarrosa_KJ569698_trnL-CAA_tRNA	Leu	CAA	69.4	Leu	89.5	None
Dipteris_chinensisWQ2562019_Copy_trnL-CAA_tRNA	Leu	CAA	62.4	Leu	76.5	None
Doryopteris_concolor_MT130605_trnL-CAA_tRNA	Leu	CAA	62.2	Leu	84.6	None
Gleichenella_pectinataGl32_trnL-CAA_tRNA	Leu	CAA	63.9	Leu	78.5	None
Hemionitis_arifolia_MT130558_trnL-CAA_tRNA	Leu	CAA	61.3	Leu	79.5	None
Histiopteris_incisa_MT130622_trnL-CAA_tRNA	Leu	CAA	62.8	Leu	79.7	None
Hypolepis_punctata_MT130616_trnL-CAA_tRNA	Leu	CAA	61.3	Leu	81.3	None
Lindsaea_dubia_Li06_-_trnL-UAA_tRNA	Leu	CAA	66.2	Leu	90.7	None
Lindsaea_grandiareolata_Li07_-_trnL-UAA_tRNA	Leu	CAA	66.8	Leu	91.4	None
Lindsaea_lancea_Li08_-_trnL-UAA_tRNA	Leu	CAA	66.2	Leu	90.7	None
Lonchitis_hirsuta_MT130654_-_trnL-CAA_tRNA	Leu	CAA	62.4	Leu	84.1	None
Lonchitis_occidentalis_MT130627_-_trnL-CAA_tRNA	Leu	CAA	62.4	Leu	84.1	None
Loxsomopsis_pearcei_Lo18_trnL-CAA_tRNA	Leu	CAA	61.4	Leu	81.6	None
Lygodium_japonicumFB276_trnL-CAA_tRNA	Leu	CAA	66.2	Leu	85.4	None
Marsilea_crenata_KC536646_trnL-CAA_tRNA	Leu	CAA	69.8	Leu	92.1	None
Metaxya_rostrata_Me31_trnL-CAA_tRNA	Leu	CAA	70.5	Leu	86.8	None
Monachosorum_henryi_MT130593_trnL-CAA_tRNA	Leu	CAA	60.3	Leu	81.4	None
Nesolindsaea_kirkii_Ne41_-_trnL-UAA_tRNA	Leu	CAA	66.7	Leu	90.4	None
Odontosoria_chinensis_MG913608_-_trnL-CAA_tRNA	Leu	CAA	66.1	Leu	91.1	None
Odontosoria_chusanum_MT130658_-_trnL-CAA_tRNA	Leu	CAA	58	Leu	83.1	None
Osmolindsaea_latisquama_Os01_-_trnL-UAA_tRNA	Leu	CAA	66.6	Leu	90.6	None
Osmolindsaea_odorata_MT130576_-_trnL-CAA_tRNA	Leu	CAA	58.6	Leu	82.7	None
Paragymnopteris_vestita_MT130618_trnL-CAA_tRNA	Leu	CAA	60.9	Leu	81.3	None
Pilularia_americana_Pi13__trnL-CAA_tRNA	Leu	CAA	58.7	Leu	84.7	None
Pityrogramma_calomelanos_MT130613_trnL-CAA_tRNA	Leu	CAA	62	Leu	84.8	None
Plagiogyria_euphlebia_NC046784_trnL-CAA_tRNA	Leu	CAA	68.5	Leu	87.2	None
Plagiogyria_subadnata_MN623362_trnL-CAA_tRNA	Leu	CAA	68.5	Leu	87.2	None
Pteris_cretica_MT130556_trnL-CAA_tRNA	Leu	CAA	67.2	Leu	92.5	None
Saccoloma_elegans_MT130580_-_trnL-CAA_tRNA	Leu	CAA	64.1	Leu	83.9	None
Saccoloma_membranaceum_Sa36_-_trnL-UAA_tRNA	Leu	CAA	70.9	Leu	93.5	None
Taenitis_blechnoides_MT130549_trnL-CAA_tRNA	Leu	CAA	62.7	Leu	82.4	None
Tapeinidium_gracile_Ta01_-_trnL-UAA_tRNA	Leu	CAA	62.3	Leu	87.4	None
Tapeinidum_lineare_Kuo2013_-_trnL-UAA_tRNA	Leu	CAA	62.3	Leu	87.4	None
Thyrsopteris_elegansa_HM1380_trnL-CAA_tRNA	Leu	CAA	61.4	Leu	81.6	None
Trichomanes_galeottiiTr08_trnL-CAA_tRNA	Leu	CAA	66	Leu	80.8	None
Microlepia_obtusiloba_MT130570_trnL-CAA_tRNA	Ser	CGA	62.5	Leu	82.4	IPD:-21.50

## Sheet: trnR-ACG
Sequence Name	tRNA Type	Anticodon	Infernal Score	Isotype Model	Isotype Score	Note
Acrostichum_aureum_MT130571_-_trnR-ACG_tRNA	Arg	ACG	56.8	Arg	65	None
Acystopteris_tenuisecta_MT130692_-_trnR-ACG_tRNA	Arg	ACG	56.8	Arg	65	None
Adiantum_sinicum_MT130585_-_trnR-ACG_tRNA	Arg	ACG	56.8	Arg	65	None
Arthropteris_palisotii_MT130588_-_trnR-ACG_tRNA	Arg	ACG	56.8	Arg	65	None
Asplenium_nidus_MT130687_-_trnR-ACG_tRNA	Arg	ACG	56.8	Arg	62.1	None
Asplenium_paucivenosum_WQ417_-_trnR-ACG_tRNA	Arg	ACG	56.8	Arg	65	None
Asplenium_wrightii_FB843_-_trnR-ACG_tRNA	Arg	ACG	56.8	Arg	65	None
Asplenium_yoshinagae_FB191_-_trnR-ACG_tRNA	Arg	ACG	56.8	Arg	65	None
Athyrium_foliolosum_MT130638_-_trnR-ACG_tRNA	Arg	ACG	56.8	Arg	65	None
Blechnidium_melanopus_MT130662_-_trnR-ACG_tRNA	Arg	ACG	56.8	Arg	65	None
Bolbitis_deltigera_MT130603_-_trnR-ACG_tRNA	Arg	ACG	56.8	Arg	65	None
Calciphilopteris_ludens_MT130590_-_trnR-ACG_tRNA	Arg	ACG	56.8	Arg	65	None
Callistopteris_apiifolia_FB792_-_trnR-ACG_tRNA	Arg	ACG	68.5	Arg	73.9	None
Christella_appendiculata_NC035842_-_trnR-ACG_tRNA	Arg	ACG	55	Arg	62.2	None
Ctenitis_decurrentipinnata_MT130665_-_trnR-ACG_tRNA	Arg	ACG	56.8	Arg	65	None
Cyclopeltis_crenata_MT130541_-_trnR-ACG_tRNA	Arg	ACG	56.8	Arg	65	None
Cyrtomium_devexiscapulae_NC028542_-_trnR-ACG_tRNA	Arg	ACG	56.8	Arg	65	None
Cystodium_sorbifolium_MT130630_-_trnR-ACG_tRNA	Arg	ACG	56.8	Arg	65	None
Davallia_assamica_MT130637_-_trnR-ACG_tRNA	Arg	ACG	56.8	Arg	65	None
Deparia_viridifrons_NC035846_-_trnR-ACG_tRNA	Arg	ACG	56.8	Arg	65	None
Desmophlebium_lechleri_MT130626_-_trnR-ACG_tRNA	Arg	ACG	56.8	Arg	65	None
Dicranopteris_ampla_FB304_-_trnR-ACG_tRNA	Arg	ACG	56.8	Arg	65.9	None
Dicranopteris_pedata_FB095_-_trnR-ACG_tRNA	Arg	ACG	56.8	Arg	65.9	None
Didymochlaena_truncatula_MT130600_-_trnR-ACG_tRNA	Arg	ACG	56.8	Arg	65	None
Diplaziopsis_brunoniana_MT130567_-_trnR-ACG_tRNA	Arg	ACG	55	Arg	62.2	None
Diplopterygium_blotianum_FB698	Arg	ACG	56.8	Arg	65.9	None
Diplopterygium_glaucum_FB308_-_trnR-ACG_tRNA	Arg	ACG	56.8	Arg	65.9	None
Diplopterygium_laevissimum_FB134_-_trnR-ACG_tRNA	Arg	ACG	56.8	Arg	65.9	None
Diplopterygium_rufopilosa_WQ400_-_trnR-ACG_tRNA	Arg	ACG	56.8	Arg	65.9	None
Drynaria_quercifolia_MT130596_-_trnR-ACG_tRNA	Arg	ACG	56.8	Arg	65	None
Gymnocarpium_oyamense_MT130632_-_trnR-ACG_tRNA	Arg	ACG	56.8	Arg	65	None
Gymnogrammitis_dareiformis_MT130547_-_trnR-ACG_tRNA	Arg	ACG	56.8	Arg	65	None
Homalosorus_pycnocarpos_NC035855_-_trnR-ACG_tRNA	Arg	ACG	55	Arg	62.2	None
Hymenasplenium_obliquissimum_MT130674_-_trnR-ACG_tRNA	Arg	ACG	56.8	Arg	65	None
Hymenasplenium_obscurum_FB051_-_trnR-ACG_tRNA	Arg	ACG	56.8	Arg	65	None
Hypodematium_crenatum_MT130540_-_trnR-ACG_tRNA	Arg	ACG	56.8	Arg	65	None
Hypolepis_punctata_MT130616_-_trnR-ACG_tRNA	Arg	ACG	56.8	Arg	65	None
Lepisorus_affinis_MT130664_-_trnR-ACG_tRNA	Arg	ACG	56.8	Arg	65	None
Lindsaea_cultrata_MT130672_-_trnR-ACG_tRNA	Arg	ACG	56.8	Arg	65	None
Llavea_cordifolia_NC040216_-_trnR-ACG_tRNA	Arg	ACG	56.8	Arg	65	None
Loxogramme_chinensis_MT130671_-_trnR-ACG_tRNA	Arg	ACG	56.8	Arg	65	None
Marsilea_crenata_KC536646_-_trnR-ACG_tRNA	Arg	ACG	64.2	Arg	73.8	None
Matteuccia_struthiopteris_MT130666_-_trnR-ACG_tRNA	Arg	ACG	56.8	Arg	65	None
Microgramma_lycopodioides_MT130699_-_trnR-ACG_tRNA	Arg	ACG	58.8	Arg	65	None
Microlepia_obtusiloba_MT130570_-_trnR-ACG_tRNA	Arg	ACG	56.8	Arg	65	None
Micropolypodium_sikkimense_MT130599_-_trnR-ACG_tRNA	Arg	ACG	56.8	Arg	65	None
Monachosorum_henryi_MT130593_-_trnR-ACG_tRNA	Arg	ACG	56.8	Arg	65	None
Nephrolepis_biserrata_MT130615_-_trnR-ACG_tRNA	Arg	ACG	56.8	Arg	65	None
Odontosoria_chusanum_MT130658_-_trnR-ACG_tRNA	Arg	ACG	56.8	Arg	65	None
Oleandra_wallichii_MT130650_-_trnR-ACG_tRNA	Arg	ACG	56.8	Arg	65	None
Osmolindsaea_odorata_MT130576_-_trnR-ACG_tRNA	Arg	ACG	56.8	Arg	65	None
Pecluma_dulcis_NC044685_-_trnR-ACG_tRNA	Arg	ACG	56.8	Arg	65	None
Pentarhizidium_orientale_MT130641_-_trnR-ACG_tRNA	Arg	ACG	56.8	Arg	65	None
Pilularia_americana_Pi13__-_trnR-ACG_tRNA	Arg	ACG	60.6	Arg	67.3	None
Platycerium_wallichii_MT130688_-_trnR-ACG_tRNA	Arg	ACG	56.8	Arg	65	None
Pleocnemia_winitii_MT130681_-_trnR-ACG_tRNA	Arg	ACG	56.8	Arg	65	None
Pseudophegopteris_aurita_NC035861_-_trnR-ACG_tRNA	Arg	ACG	56.8	Arg	65	None
Pteridrys_cnemidaria_MT130579_-_trnR-ACG_tRNA	Arg	ACG	56.8	Arg	65	None
Pteris_cretica_MT130556_-_trnR-ACG_tRNA	Arg	ACG	56.8	Arg	65	None
Pyrrosia_costata_MT130646_-_trnR-ACG_tRNA	Arg	ACG	56.8	Arg	65	None
Rhachidosorus_consimilis_NC035862_-_trnR-ACG_tRNA	Arg	ACG	56.8	Arg	65	None
Salvinia_cucullata_MF177095_-_trnR-ACG_tRNA	Arg	ACG	67.9	Arg	70.4	None
Selliguea_chrysotricha-WQ414_-_trnR-ACG_tRNA	Arg	ACG	56.8	Arg	65	None
Selliguea_connexa-MT130564_-_trnR-ACG_tRNA	Arg	ACG	56.8	Arg	65	None
Selliguea_dareiformis_MW876368_-_trnR-ACG_tRNA	Arg	ACG	56.8	Arg	65	None
Selliguea_ebenipes_var_ebenipes-FB184_-_trnR-ACG_tRNA	Arg	ACG	56.8	Arg	65	None
Selliguea_hastata-Lu642_-_trnR-ACG_tRNA	Arg	ACG	56.8	Arg	65	None
Selliguea_oxyloba-MT130663_-_trnR-ACG_tRNA	Arg	ACG	56.8	Arg	65	None
Selliguea_taeniata_MW876349_-_trnR-ACG_tRNA	Arg	ACG	56.8	Arg	65	None
Tapeinidium_gracile_Ta01_-_trnR-ACG_tRNA	Arg	ACG	56.8	Arg	65	None
Tectaria_decurrens_MT130601_-_trnR-ACG_tRNA	Arg	ACG	56.8	Arg	65	None
Woodsia_polystichoides_MT130700_-_trnR-ACG_tRNA	Arg	ACG	56.8	Arg	65	None
Woodwardia_harlandii_MT130602_-_trnR-ACG_tRNA	Arg	ACG	56.8	Arg	65	None
Alsophila_costularis_NC044080_-_trnR-ACG_tRNA	Arg	ACG	57.5	Ile2	65.5	IPD:-1.10
Cyathea_lepifera_MN623357_-_trnR-ACG_tRNA	Arg	ACG	57.5	Ile2	65.5	IPD:-1.10
Equisetum_arvense_NC014699_-_trnR-ACG_tRNA	Arg	ACG	66.6	Ile2	72	IPD:-0.80
Equisetum_hyemale_NC020146_-_trnR-ACG_tRNA	Arg	ACG	66.6	Ile2	72	IPD:-0.80
Psilotum_nudum_NC003386_-_trnR-ACG_tRNA	Arg	ACG	50.8	Met	53.3	IPD:-7.90
Marattia_fraxinea_Ma22_-_trnR-ACG_tRNA	Arg	ACG	64.7	Phe	65.3	IPD:-10.80
Actinostachys_pennula_KU764518_-_trnR-ACG_tRNA	Arg	ACG	59.9	Pro	69.8	IPD:-3.00
Amborella_trichopoda-NC005086_-_trnR-ACG_tRNA	Arg	ACG	57.5	Pro	67.4	IPD:-1.70
Anemia_adiantifolia_An25_-_trnR-ACG_tRNA	Arg	ACG	59.9	Pro	69.8	IPD:-3.00
Azolla_caroliniana_MF177093_-_trnR-ACG_tRNA	Arg	ACG	57.5	Pro	66	IPD:-1.10
Botrychium_sp_KM817789_-_trnR-ACG_tRNA	Arg	ACG	53.9	Pro	58.4	IPD:-9.40
Cephalomanes_javanicum_FB802_-_trnR-ACG_tRNA	Arg	ACG	57.5	Pro	66	IPD:-1.10
Cheiropleuria_bicuspis_wade3981_-_trnR-ACG_tRNA	Arg	ACG	57.5	Pro	66	IPD:-1.10
Cibotium_barometz_MT130589_-_trnR-ACG_tRNA	Arg	ACG	57.5	Pro	66	IPD:-1.10
Crepidomanes_latealatum_FB547_-_trnR-ACG_tRNA	Arg	ACG	57.5	Pro	66	IPD:-1.10
Culcita_coniifolia_Cu06__-_trnR-ACG_tRNA	Arg	ACG	57.4	Pro	65	IPD:-0.30
Cycas_revoluta-NC020319_-_trnR-ACG_tRNA	Arg	ACG	57.5	Pro	67.4	IPD:-1.70
Dicksonia_squarrosa_KJ569698_-_trnR-ACG_tRNA	Arg	ACG	57.5	Pro	66	IPD:-1.10
Dipteris_wallichii_Zuo2692_-_trnR-ACG_tRNA	Arg	ACG	57.5	Pro	66	IPD:-1.10
Hemidictyum_marginatum_MT130628_-_trnR-ACG_tRNA	Arg	ACG	57.5	Pro	66	IPD:-1.10
Hymenophyllum_badium_FB501_-_trnR-ACG_tRNA	Arg	ACG	57.5	Pro	66	IPD:-1.10
Hymenophyllum_barbatum_FB724_-_trnR-ACG_tRNA	Arg	ACG	57.5	Pro	66	IPD:-1.10
Hymenophyllum_crassipetiolatum-Hy39_-_trnR-ACG_tRNA	Arg	ACG	57.5	Pro	66	IPD:-1.10
Hymenophyllum_holochilum_NC039753_-_trnR-ACG_tRNA	Arg	ACG	57.5	Pro	66	IPD:-1.10
Hymenophyllum_pallidum_Kuo2605_-_trnR-ACG_tRNA	Arg	ACG	57.5	Pro	66	IPD:-1.10
Hymenophyllum_polyanthos_FB580_-_trnR-ACG_tRNA	Arg	ACG	57.5	Pro	66	IPD:-1.10
Lomariopsis_cochinchinensis_MT130608_-_trnR-ACG_tRNA	Arg	ACG	57.5	Pro	66	IPD:-1.10
Lonchitis_hirsuta_MT130654_-_trnR-ACG_tRNA	Arg	ACG	57.5	Pro	66	IPD:-1.10
Lonchitis_occidentalis_MT130627_-_trnR-ACG_tRNA	Arg	ACG	57.5	Pro	66	IPD:-1.10
Loxsomopsis_pearcei_Lo18_-_trnR-ACG_tRNA	Arg	ACG	57.5	Pro	66	IPD:-1.10
Lycopodium_clavatum_NC_040994_-_trnR-ACG_tRNA	Arg	ACG	57.5	Pro	67.4	IPD:-5.50
Mankyua_chejuensis_NC017006_-_trnR-ACG_tRNA	Arg	ACG	53.9	Pro	58.4	IPD:-9.40
Metaxya_rostrata_Me31_-_trnR-ACG_tRNA	Arg	ACG	57.5	Pro	66	IPD:-1.10
Ophioglossum_californicum_NC020147_-_trnR-ACG_tRNA	Arg	ACG	53.9	Pro	58.4	IPD:-9.40
Osmunda_cinnamomea_Lu626_-_trnR-ACG_tRNA	Arg	ACG	57.5	Pro	67.4	IPD:-1.70
Osmunda_japonica-Lu598-6_-_trnR-ACG_tRNA	Arg	ACG	57.5	Pro	67.4	IPD:-1.70
Plagiogyria_euphlebia_NC046784_-_trnR-ACG_tRNA	Arg	ACG	57.5	Pro	66	IPD:-1.10
Plagiogyria_subadnata_MN623362_-_trnR-ACG_tRNA	Arg	ACG	57.5	Pro	66	IPD:-1.10
Saccoloma_elegans_MT130580_-_trnR-ACG_tRNA	Arg	ACG	57.5	Pro	66	IPD:-1.10
Schizaea_elegans_NC035807_-_trnR-ACG_tRNA	Arg	ACG	59.9	Pro	69.8	IPD:-3.00
Sticherus_truncatus_FB735_-_trnR-ACG_tRNA	Arg	ACG	57.5	Pro	67.4	IPD:-1.70
Stromatopteris_moniliformis_St48_-_trnR-ACG_tRNA	Arg	ACG	57.5	Pro	67.4	IPD:-1.70
Thyrsopteris_elegansa_HM1380_-_trnR-ACG_tRNA	Arg	ACG	57.5	Pro	66	IPD:-1.10
Tmesipteris_elongata_KJ569699_-_trnR-ACG_tRNA	Arg	ACG	52	Pro	56.8	IPD:-11.40
Trichomanes_galeottii-Tr08_-_trnR-ACG_tRNA	Arg	ACG	57.5	Pro	66	IPD:-1.10
Trichomanes_trollii_NC041122_-_trnR-ACG_tRNA	Arg	ACG	53.9	Pro	57	IPD:-5.00
Vandenboschia_auriculata_FB118_-_trnR-ACG_tRNA	Arg	ACG	57.5	Pro	66	IPD:-2.80
Vandenboschia_speciosa_NC041000_-_trnR-ACG_tRNA	Arg	ACG	57.5	Pro	66	IPD:-2.80
Abrodictyum_obscurum_var_siamense_FB797_-_trnR-ACG_tRNA	Arg	ACG	61.1	Val	67.9	IPD:-9.50
Angiopteris_angustifolia_NC026300_-_trnR-ACG_tRNA	Arg	ACG	68.4	Val	72.4	IPD:-3.60
Christensenia_aesculifolia_NC044756_-_trnR-ACG_tRNA	Arg	ACG	68.4	Val	72.4	IPD:-3.60
Lygodium_japonicum-FB276_-_trnR-ACG_tRNA	Arg	ACG	64.5	Val	73.5	IPD:-14.60
Lygodium_scandens_FB805_-_trnR-ACG_tRNA	Arg	ACG	64.5	Val	73.5	IPD:-14.60

## Sheet: trnR-CCG
Sequence Name	tRNA Type	Anticodon	Infernal Score	Isotype Model	Isotype Score	Note
Abrodictyum_obscurum_var_siamense_FB797_trnR-CCG	Arg	CCG	70	Arg	71.7	None
Azolla_pinnata_subsp_asiatica_MT130631_trnR-ttt	Gln	CTG	23.3	Arg	10.3	pseudo,IPD:-10.30
Callistopteris_apiifolia_FB792_trnR-CCG	Arg	CCG	68.6	Arg	67.9	None
Cephalomanes_javanicum_FB802_trnR-CCG	Arg	CCG	66.1	Arg	65.8	None
Crepidomanes_latealatum_FB547_trnR-CCG	Arg	CCG	65.5	Arg	68	None
Dipteris_wallichii_Zuo2692_trnR-CCG	Arg	CCG	64	Arg	65.9	None
Hymenophyllum_badium_FB501_trnR-CCG	Arg	CCG	69.1	Arg	68.2	None
Hymenophyllum_barbatum_FB724_trnR-CCG	Arg	CCG	70	Arg	71.7	None
Hymenophyllum_crassipetiolatum-Hy39_-_trnR-CCG_tRNA	Arg	CCG	70	Arg	71.7	None
Hymenophyllum_holochilum_NC039753_trnR-CCG	Arg	CCG	70	Arg	71.7	None
Hymenophyllum_pallidum_Kuo2605_-_trnR-CCG_tRNA	Arg	CCG	70	Arg	71.7	None
Hymenophyllum_polyanthos_FB580_trnR-CCG	Arg	CCG	70	Arg	71.7	None
Osmunda_cinnamomea_Lu626_trnR-CCG	Arg	CCG	61.4	Arg	59.9	None
Sticherus_truncatus_FB735_trnR-CCG	Arg	CCG	61	Arg	64.8	None
Trichomanes_galeottii-Tr08_trnR-CCG	Arg	CCG	70.7	Arg	71.5	None
Vandenboschia_auriculata_FB118_trnR-CCG	Arg	CCG	68.3	Arg	67.9	None
Loxsoma_cunninghamii_Lo17_trnR-UCG_tRNA	Arg	TCG	33.4	Ile	31	IPD:-2.90
Loxsomopsis_pearcei_Lo18_trnR-UCG_tRNA	Arg	TCG	33.4	Ile	31	IPD:-2.90
Botrychium_sp_KM817789_trnR-CCG	Arg	CCG	70.9	Lys	77.6	IPD:-11.70
Culcita_coniifolia_Cu06__trnR-UCG_tRNA	Arg	TCG	42.6	Lys	41.5	IPD:-13.40
Dicranopteris_ampla_FB304_trnR-CCG	Arg	CCG	68.8	Lys	67.5	IPD:-2.20
Dicranopteris_pedata_FB095_trnR-CCG	Arg	CCG	68.8	Lys	67.5	IPD:-2.20
Diplopterygium_rufopilosa_WQ400_trnR-CCG	Arg	CCG	59.1	Lys	62.1	IPD:-0.20
Ophioglossum_californicum_NC020147_trnR-CCG	Arg	CCG	59.4	Lys	53.4	IPD:-2.50
Stromatopteris_moniliformis_St48_-_trnR-CCG_tRNA	Arg	CCG	69.1	Lys	70.2	IPD:-6.50
Calochlaena_villosa_Cu07_trnR-UCG_tRNA	Arg	TCG	42.7	Phe	39.2	IPD:-14.30
Cibotium_barometz_MT130589_trnR-UCG_tRNA	Sup	TCA	44.4	Phe	40.3	IPD:-40.30
Cyathea_acutula_UC_ROM1470_trnR-UCG_tRNA	Arg	TCG	44.7	Phe	45.3	IPD:-16.00
Cyathea_concava_UC_ROM1496_trnR-UCG_tRNA	Arg	TCG	44.7	Phe	45.3	IPD:-16.00
Dicksonia_sellowiana_Di15_trnR-UCG_tRNA	Arg	TCG	46.3	Phe	42.7	IPD:-14.30
Dicksonia_thyrsopteroides_Di16__trnR-UCG_tRNA	Gln	TTG	50.8	Phe	43.3	IPD:-31.60
Lophosoria_quadripinnata_Lo16_trnR-UCG_tRNA	Arg	TCG	35.5	Phe	32.2	IPD:-12.10
Metaxya_rostrata_Me31_trnR-UCG_tRNA	Arg	TCG	35.7	Phe	31	IPD:-10.10
Regnellidium_diphyllum_Re34_trnR-ttt	Arg	TCT	23.3	Pro	9.6	IPD:-9.60
Angiopteris_angustifolia_NC026300_trnR-CCG	Arg	CCG	58.7	Val	63.8	IPD:-14.00
Cheiropleuria_bicuspis_wade3981_trnR-CCG	Arg	CCG	65.2	Val	68.4	IPD:-6.70
Christensenia_aesculifolia_NC044756_trnR-CCG	Arg	CCG	62.6	Val	66.8	IPD:-14.80
Diplopterygium_blotianum_FB698	Arg	CCG	65.1	Val	67.7	IPD:-2.20
Diplopterygium_glaucum_FB308_trnR-CCG	Arg	CCG	65.1	Val	67.7	IPD:-2.20
Diplopterygium_laevissimum_FB134_trnR-CCG	Arg	CCG	64.4	Val	67.7	IPD:-4.90
Equisetum_arvense_NC014699_trnR-CCG	Arg	CCG	59.2	Val	63.9	IPD:-10.60
Equisetum_hyemale_NC020146_trnR-CCG	Arg	CCG	47.5	Val	44.6	IPD:-1.00
Lycopodium_clavatum_NC_040994_trnR-CCG	Arg	CCG	69.6	Val	70.7	IPD:-2.60
Mankyua_chejuensis_NC017006_trnR-CCG	Arg	CCG	62.9	Val	67.9	IPD:-11.20
Marattia_fraxinea_Ma22_trnR-CCG	Arg	CCG	58.7	Val	63.8	IPD:-14.00
Osmunda_japonica-Lu598-6_trnR-CCG	Arg	CCG	61.4	Val	64.9	IPD:-2.10
Psilotum_nudum_NC003386_trnR-CCG	Arg	CCG	61.7	Val	67.5	IPD:-16.10
Tmesipteris_elongata_KJ569699_trnR-CCG	Arg	CCG	59.2	Val	59	IPD:-8.90

## Sheet: trnR-UCU
Sequence Name	tRNA Type	Anticodon	Infernal Score	Isotype Model	Isotype Score	Note
Amborella_trichopoda-NC005086_-_trnR-UCU_tRNA	Arg	TCT	62.5	Arg	60.8	None
Hymenophyllum_barbatum_FB724_-_trnR-UCU_tRNA	Arg	TCT	55.7	Arg	54.9	None
Hymenophyllum_crassipetiolatum-Hy39_-_trnR-UCU_tRNA	Arg	TCT	59.8	Arg	58.4	None
Hymenophyllum_pallidum_Kuo2605_-_trnR-UCU_tRNA	Arg	TCT	55.7	Arg	54.9	None
Hymenophyllum_polyanthos_FB580_-_trnR-UCU_tRNA	Arg	TCT	55.7	Arg	54.9	None
Osmunda_cinnamomea_Lu626_-_trnR-UCU_tRNA	Arg	TCT	58.6	Arg	56.4	None
Osmunda_japonica-Lu598-6_-_trnR-UCU_tRNA	Arg	TCT	58.6	Arg	56.4	None
Abrodictyum_obscurum_var_siamense_FB797_-_trnR-UCU_tRNA	Arg	TCT	55.9	Trp	65.3	IPD:-14.30
Acrostichum_aureum_MT130571_-_trnR-UCU_tRNA	Arg	TCT	55.9	Trp	63.6	IPD:-12.50
Actinostachys_pennula_KU764518_-_trnR-UCU_tRNA	Arg	TCT	60.9	Trp	69.6	IPD:-5.20
Adiantum_sinicum_MT130585_-_trnR-UCU_tRNA	Arg	TCT	56.6	Trp	67.3	IPD:-16.40
Alsophila_costularis_NC044080_-_trnR-UCU_tRNA	Arg	TCT	53	Trp	67.2	IPD:-18.50
Anemia_adiantifolia_An25_-_trnR-UCU_tRNA	Arg	TCT	57.4	Trp	69.5	IPD:-13.60
Angiopteris_angustifolia_NC026300_-_trnR-UCU_tRNA	Arg	TCT	53.2	Trp	58.6	IPD:-7.20
Azolla_caroliniana_MF177093_-_trnR-UCU_tRNA	Arg	TCT	55.6	Trp	61.1	IPD:-9.90
Botrychium_sp_KM817789_-_trnR-UCU_tRNA	Arg	TCT	52	Trp	63.3	IPD:-10.10
Calciphilopteris_ludens_MT130590_-_trnR-UCU_tRNA	Arg	TCT	52.6	Trp	66	IPD:-17.30
Callistopteris_apiifolia_FB792_-_trnR-UCU_tRNA	Arg	TCT	58.3	Trp	67.1	IPD:-10.40
Cephalomanes_javanicum_FB802_-_trnR-UCU_tRNA	Arg	TCT	56.8	Trp	65.9	IPD:-9.40
Cheiropleuria_bicuspis_wade3981_-_trnR-UCU_tRNA	Arg	TCT	55.5	Trp	61.5	IPD:-6.50
Christensenia_aesculifolia_NC044756_-_trnR-UCU_tRNA	Arg	TCT	53.2	Trp	58.6	IPD:-7.20
Cibotium_barometz_MT130589_-_trnR-UCU_tRNA	Arg	TCT	57.2	Trp	68.3	IPD:-16.10
Crepidomanes_latealatum_FB547_-_trnR-UCU_tRNA	Arg	TCT	56.8	Trp	65.9	IPD:-9.40
Culcita_coniifolia_Cu06__-_trnR-UCU_tRNA	Arg	TCT	57.2	Trp	68.3	IPD:-16.10
Cyathea_lepifera_MN623357_-_trnR-UCU_tRNA	Arg	TCT	57.2	Trp	68.3	IPD:-16.10
Cycas_revoluta-NC020319_-_trnR-UCU_tRNA	Arg	TCT	53.4	Trp	60.6	IPD:-3.80
Cystodium_sorbifolium_MT130630_-_trnR-UCU_tRNA	Arg	TCT	57.2	Trp	68.3	IPD:-16.10
Dicksonia_squarrosa_KJ569698_-_trnR-UCU_tRNA	Arg	TCT	56.1	Trp	68.6	IPD:-17.50
Dicranopteris_ampla_FB304_-_trnR-UCU_tRNA	Arg	TCT	62.3	Trp	70.3	IPD:-5.20
Dicranopteris_pedata_FB095_-_trnR-UCU_tRNA	Arg	TCT	62.3	Trp	70.3	IPD:-5.20
Diplopterygium_blotianum_FB698	Arg	TCT	62.3	Trp	70.3	IPD:-5.20
Diplopterygium_glaucum_FB308_-_trnR-UCU_tRNA	Arg	TCT	62.3	Trp	70.3	IPD:-5.20
Diplopterygium_laevissimum_FB134_-_trnR-UCU_tRNA	Arg	TCT	62.3	Trp	70.3	IPD:-5.20
Diplopterygium_rufopilosa_WQ400_-_trnR-UCU_tRNA	Arg	TCT	62.3	Trp	70.3	IPD:-5.20
Dipteris_wallichii_Zuo2692_-_trnR-UCU_tRNA	Arg	TCT	55.5	Trp	61.5	IPD:-6.50
Equisetum_arvense_NC014699_-_trnR-UCU_tRNA	Arg	TCT	54.4	Trp	59.4	IPD:-7.20
Equisetum_hyemale_NC020146_-_trnR-UCU_tRNA	Arg	TCT	47.4	Trp	52.6	IPD:-12.10
Hymenophyllum_badium_FB501_-_trnR-UCU_tRNA	Arg	TCT	53.8	Trp	52.4	IPD:-0.30
Hypolepis_punctata_MT130616_-_trnR-UCU_tRNA	Arg	TCT	58.6	Trp	69	IPD:-12.90
Lindsaea_cultrata_MT130672_-_trnR-UCU_tRNA	Arg	TCT	54.7	Trp	69.4	IPD:-18.50
Llavea_cordifolia_NC040216_-_trnR-UCU_tRNA	Arg	TCT	58.6	Trp	69	IPD:-12.90
Lonchitis_hirsuta_MT130654_-_trnR-UCU_tRNA	Arg	TCT	50.1	Trp	62.6	IPD:-13.60
Lonchitis_occidentalis_MT130627_-_trnR-UCU_tRNA	Arg	TCT	50.1	Trp	62.6	IPD:-13.60
Loxsomopsis_pearcei_Lo18_-_trnR-UCU_tRNA	Arg	TCT	58.6	Trp	69	IPD:-12.90
Lycopodium_clavatum_NC_040994_-_trnR-UCU_tRNA	Arg	TCT	55.1	Trp	61.7	IPD:-5.30
Lygodium_japonicum-FB276_-_trnR-UCU_tRNA	Arg	TCT	58.7	Trp	67.4	IPD:-8.40
Lygodium_scandens_FB805_-_trnR-UCU_tRNA	Arg	TCT	58	Trp	64.3	IPD:-4.30
Mankyua_chejuensis_NC017006_-_trnR-UCU_tRNA	Arg	TCT	54.3	Trp	64	IPD:-11.40
Marattia_fraxinea_Ma22_-_trnR-UCU_tRNA	Arg	TCT	53.2	Trp	58.6	IPD:-7.20
Marsilea_crenata_KC536646_-_trnR-UCU_tRNA	Arg	TCT	56.5	Trp	65.2	IPD:-12.00
Metaxya_rostrata_Me31_-_trnR-UCU_tRNA	Arg	TCT	56.5	Trp	69.7	IPD:-17.40
Microlepia_obtusiloba_MT130570_-_trnR-UCU_tRNA	Arg	TCT	54.7	Trp	63.5	IPD:-9.80
Monachosorum_henryi_MT130593_-_trnR-UCU_tRNA	Arg	TCT	57.2	Trp	68.3	IPD:-16.10
Odontosoria_chusanum_MT130658_-_trnR-UCU_tRNA	Arg	TCT	54.7	Trp	69.4	IPD:-18.50
Ophioglossum_californicum_NC020147_-_trnR-UCU_tRNA	Arg	TCT	51.9	Trp	53.9	IPD:-3.60
Osmolindsaea_odorata_MT130576_-_trnR-UCU_tRNA	Arg	TCT	54.7	Trp	69.4	IPD:-18.50
Pilularia_americana_Pi13__-_trnR-UCU_tRNA	Arg	TCT	56.5	Trp	65.2	IPD:-12.00
Plagiogyria_euphlebia_NC046784_-_trnR-UCU_tRNA	Arg	TCT	57.2	Trp	68.3	IPD:-16.10
Plagiogyria_subadnata_MN623362_-_trnR-UCU_tRNA	Arg	TCT	57.2	Trp	68.3	IPD:-16.10
Psilotum_nudum_NC003386_-_trnR-UCU_tRNA	Arg	TCT	58.6	Trp	68.1	IPD:-8.70
Pteris_cretica_MT130556_-_trnR-UCU_tRNA	Arg	TCT	57.6	Trp	68.3	IPD:-13.50
Saccoloma_elegans_MT130580_-_trnR-UCU_tRNA	Arg	TCT	57.2	Trp	68.3	IPD:-16.10
Salvinia_cucullata_MF177095_-_trnR-UCU_tRNA	Arg	TCT	58.3	Trp	67.7	IPD:-11.70
Schizaea_elegans_NC035807_-_trnR-UCU_tRNA	Arg	TCT	59.7	Trp	70.2	IPD:-12.80
Sticherus_truncatus_FB735_-_trnR-UCU_tRNA	Arg	TCT	60.7	Trp	69.1	IPD:-7.70
Stromatopteris_moniliformis_St48_-_trnR-UCU_tRNA	Arg	TCT	57.5	Trp	67.6	IPD:-5.50
Tapeinidium_gracile_Ta01_-_trnR-UCU_tRNA	Arg	TCT	53.3	Trp	62.9	IPD:-17.30
Thyrsopteris_elegansa_HM1380_-_trnR-UCU_tRNA	Arg	TCT	57.2	Trp	68.3	IPD:-16.10
Tmesipteris_elongata_KJ569699_-_trnR-UCU_tRNA	Arg	TCT	46.6	Trp	57	IPD:-6.00
Trichomanes_galeottii-Tr08_-_trnR-UCU_tRNA	Arg	TCT	57.8	Trp	66.7	IPD:-12.00
Trichomanes_trollii_NC041122_-_trnR-UCU_tRNA	Arg	TCT	58.3	Trp	67.1	IPD:-10.40
Vandenboschia_auriculata_FB118_-_trnR-UCU_tRNA	Arg	TCT	57.5	Trp	63.7	IPD:-4.90
Vandenboschia_speciosa_NC041000_-_trnR-UCU_tRNA	Arg	TCT	55.8	Trp	66.2	IPD:-9.00

## Sheet: trnM-CAU
Sequence Name	tRNA Type	Anticodon	Infernal Score	Isotype Model	Isotype Score	Note
Adiantum_davidiiLu798__trnMCAU_tRNA	Met	CAT	58.6	Met	70.6	None
Adiantum_hispidulumLT615217__trnMCAU_tRNA	Met	CAT	60.5	Met	71.1	None
Adiantum_philippenseFB336__trnMCAU_tRNA	Met	CAT	54.4	Met	67.4	None
Adiantum_sinicum_MT130585_-_trnM-CAU_tRNA	Met	CAT	54.4	Met	60.3	None
Adiantum_sinicumFB264__trnMCAU_tRNA	Met	CAT	54.4	Met	60.3	None
Adiantum_tricholepisMH173071__trnMCAU_tRNA	Met	CAT	54.8	Met	64.2	None
Amborella_trichopoda-NC005086_-_trnM-CAU_tRNA	Met	CAT	46.4	Met	55.1	None
Anemia_adiantifolia_An25_-_trnM-CAU_tRNA	Met	CAT	59.5	Met	67.4	None
Antrophyum_semicostatumMH173087__trnMCAU_tRNA	Met	CAT	56.4	Met	64.6	None
Botrychium_sp_KM817789_-_trnM-CAU_tRNA	Met	CAT	58.6	Met	70.6	None
Calciphilopteris_ludens_MT130590_-_trnM-CAU_tRNA	Met	CAT	57.8	Met	66	None
Calciphilopteris_ludens17HT0267__trnMCAU_tRNA	Met	CAT	57.8	Met	66	None
Cheiropleuria_bicuspis_wade3981_-_trnM-CAU_tRNA	Met	CAT	59.8	Met	66.6	None
Cibotium_barometz_MT130589_-_trnM-CAU_tRNA	Met	CAT	59.5	Met	67.4	None
Culcita_coniifolia_Cu06__-_trnM-CAU_tRNA	Met	CAT	59.5	Met	67.4	None
Cycas_revoluta-NC020319_-_trnM-CAU_tRNA	Met	CAT	57.2	Met	67.2	None
Cystodium_sorbifolium_MT130630_-_trnM-CAU_tRNA	Met	CAT	60.4	Met	67.4	None
Dicksonia_squarrosa_KJ569698_-_trnM-CAU_tRNA	Met	CAT	59.5	Met	67.4	None
Dipteris_wallichii_Zuo2692_-_trnM-CAU_tRNA	Met	CAT	58.8	Met	66.2	None
Hypolepis_punctata_MT130616_-_trnM-CAU_tRNA	Met	CAT	59.5	Met	67.4	None
Lindsaea_cultrata_MT130672_-_trnM-CAU_tRNA	Met	CAT	59.5	Met	67.4	None
Lonchitis_hirsuta_MT130654_-_trnM-CAU_tRNA	Met	CAT	61.4	Met	71.5	None
Lonchitis_occidentalis_MT130627_-_trnM-CAU_tRNA	Met	CAT	61.4	Met	71.5	None
Loxsomopsis_pearcei_Lo18_-_trnM-CAU_tRNA	Met	CAT	59.5	Met	67.4	None
Lygodium_japonicum-FB276_-_trnM-CAU_tRNA	Met	CAT	59.5	Met	67.4	None
Lygodium_scandens_FB805_-_trnM-CAU_tRNA	Met	CAT	59.5	Met	67.4	None
Macrothelypteris_torresianaLu649__trnMCAU_tRNA	Met	CAT	59.3	Met	67.5	None
Marsilea_crenata_KC536646_-_trnM-CAU_tRNA	Met	CAT	59.5	Met	67.4	None
Metaxya_rostrata_Me31_-_trnM-CAU_tRNA	Met	CAT	59.5	Met	67.4	None
Microlepia_khasiyanaFB665__trnMCAU_tRNA	Met	CAT	59.5	Met	67.4	None
Microlepia_obtusiloba_MT130570_-_trnM-CAU_tRNA	Met	CAT	59.5	Met	67.4	None
Monachosorum_henryi_MT130593_-_trnM-CAU_tRNA	Met	CAT	60.3	Met	67.6	None
Monachosorum_henryiWQ249__trnMCAU_tRNA	Met	CAT	60.3	Met	67.6	None
Odontosoria_chusanum_MT130658_-_trnM-CAU_tRNA	Met	CAT	59.5	Met	67.4	None
Ophioglossum_californicum_NC020147_-_trnM-CAU_tRNA	Met	CAT	53.5	Met	56.1	None
Osmolindsaea_odorata_MT130576_-_trnM-CAU_tRNA	Met	CAT	59.5	Met	67.4	None
Pilularia_americana_Pi13__-_trnM-CAU_tRNA	Met	CAT	59.5	Met	67.4	None
Plagiogyria_euphlebia_NC046784_-_trnM-CAU_tRNA	Met	CAT	59.5	Met	67.4	None
Plagiogyria_subadnata_MN623362_-_trnM-CAU_tRNA	Met	CAT	59.5	Met	67.4	None
Pteridium_revolutumWQ269__trnMCAU_tRNA	Met	CAT	58.9	Met	64.1	None
Saccoloma_elegans_MT130580_-_trnM-CAU_tRNA	Met	CAT	60.4	Met	67.4	None
Schizaea_elegans_NC035807_-_trnM-CAU_tRNA	Met	CAT	59.5	Met	67.4	None
Scoliosorus_ensiformisMH173090__trnMCAU_tRNA	Met	CAT	55	Met	63.3	None
Tapeinidium_gracile_Ta01_-_trnM-CAU_tRNA	Met	CAT	59.5	Met	67.4	None
Thyrsopteris_elegansa_HM1380_-_trnM-CAU_tRNA	Met	CAT	59.5	Met	67.4	None
Vaginularia_trichoideaMH173085__trnMCAU_tRNA	Met	CAT	56.3	Met	67.2	None
Abrodictyum_obscurum_var_siamense_FB797_-_trnM-CAU_tRNA	Met	CAT	52.4	Val	52.1	IPD:-4.70
Acrostichum_aureum_MT130571_-_trnM-CAU_tRNA	Met	CAT	58.9	Val	67.1	IPD:-5.20
Acrostichum_aureumFB377__trnMCAU_tRNA	Met	CAT	58.9	Val	67.1	IPD:-5.20
Actinostachys_pennula_KU764518_-_trnM-CAU_tRNA	Met	CAT	59.9	Val	65.9	IPD:-0.40
Adiantum_capillusvenerisNC004766__trnM_tRNA	Met	CAT	60.5	Val	69.9	IPD:-1.80
Alsophila_costularis_NC044080_-_trnM-CAU_tRNA	Met	CAT	60.5	Val	65.3	IPD:-0.10
Angiopteris_angustifolia_NC026300_-_trnM-CAU_tRNA	Met	CAT	60.3	Val	70.6	IPD:-3.00
Azolla_caroliniana_MF177093_-_trnM-CAU_tRNA	Met	CAT	55.4	Val	61.6	IPD:-0.30
Callistopteris_apiifolia_FB792_-_trnM-CAU_tRNA	Met	CAT	55.5	Val	67.9	IPD:-9.30
Cephalomanes_javanicum_FB802_-_trnM-CAU_tRNA	Met	CAT	54.7	Val	65.6	IPD:-7.20
Ceratopteris_richardiiKM052729__trnMCAU_tRNA	Met	CAT	58.6	Val	66.7	IPD:-2.80
Christensenia_aesculifolia_NC044756_-_trnM-CAU_tRNA	Met	CAT	54.6	Val	64.9	IPD:-4.20
Coniogramme_petelotiiFB158__trnMCAU_tRNA	Met	CAT	58.3	Val	65.1	IPD:-1.20
Crepidomanes_latealatum_FB547_-_trnM-CAU_tRNA	Met	CAT	56.8	Val	67.2	IPD:-7.60
Cyathea_lepifera_MN623357_-_trnM-CAU_tRNA	Met	CAT	60.5	Val	65.3	IPD:-0.10
Dicranopteris_ampla_FB304_-_trnM-CAU_tRNA	Met	CAT	59	Val	66.1	IPD:-0.10
Dicranopteris_pedata_FB095_-_trnM-CAU_tRNA	Met	CAT	59	Val	66.1	IPD:-0.10
Diplopterygium_blotianum_FB698	Met	CAT	59	Val	66.1	IPD:-0.10
Diplopterygium_glaucum_FB308_-_trnM-CAU_tRNA	Met	CAT	59	Val	66.1	IPD:-0.10
Diplopterygium_laevissimum_FB134_-_trnM-CAU_tRNA	Met	CAT	59	Val	66.1	IPD:-0.10
Diplopterygium_rufopilosa_WQ400_-_trnM-CAU_tRNA	Met	CAT	59	Val	66.1	IPD:-0.10
Equisetum_arvense_NC014699_-_trnM-CAU_tRNA	Met	CAT	60.3	Val	70.6	IPD:-3.00
Equisetum_hyemale_NC020146_-_trnM-CAU_tRNA	Met	CAT	60.3	Val	70.6	IPD:-3.00
Haplopteris_flexuosaFB627__trnMCAU_tRNA	Met	CAT	59.4	Val	66.2	IPD:-1.20
Hymenophyllum_badium_FB501_-_trnM-CAU_tRNA	Met	CAT	59.4	Val	67.5	IPD:-3.10
Hymenophyllum_barbatum_FB724_-_trnM-CAU_tRNA	Met	CAT	62.1	Val	71.7	IPD:-3.60
Hymenophyllum_crassipetiolatum-Hy39_-_trnM-CAU_tRNA	Met	CAT	62.1	Val	71.7	IPD:-3.60
Hymenophyllum_holochilum_NC039753_-_trnM-CAT_tRNA	Met	CAT	62.1	Val	71.7	IPD:-3.60
Hymenophyllum_pallidum_Kuo2605_-_trnM-CAU_tRNA	Met	CAT	62.1	Val	71.7	IPD:-3.60
Hymenophyllum_polyanthos_FB580_-_trnM-CAU_tRNA	Met	CAT	56.8	Val	68.7	IPD:-7.70
Llavea_cordifolia_NC040216_-_trnM-CAU_tRNA	Met	CAT	60.2	Val	66.1	IPD:-1.70
Llavea_cordifoliaMH173088__trnMCAU_tRNA	Met	CAT	60.2	Val	66.1	IPD:-1.70
Lycopodium_clavatum_NC_040994_-_trnM-CAU_tRNA	Met	CAT	60.3	Val	70.6	IPD:-3.00
Mankyua_chejuensis_NC017006_-_trnM-CAU_tRNA	Met	CAT	60.3	Val	70.6	IPD:-3.00
Marattia_fraxinea_Ma22_-_trnM-CAU_tRNA	Met	CAT	60.3	Val	70.6	IPD:-3.00
Myriopteris_scabraMH173083__trnMCAU_tRNA	Met	CAT	57.6	Val	70.5	IPD:-5.30
Osmunda_cinnamomea_Lu626_-_trnM-CAU_tRNA	Met	CAT	60.3	Val	70.6	IPD:-3.00
Osmunda_japonica-Lu598-6_-_trnM-CAU_tRNA	Met	CAT	60.3	Val	70.6	IPD:-3.00
Psilotum_nudum_NC003386_-_trnM-CAU_tRNA	Met	CAT	62.8	Val	72.4	IPD:-2.90
Pteris_cretica_MT130556_-_trnM-CAU_tRNA	Met	CAT	59.3	Val	69.7	IPD:-2.10
Pteris_dissitifoliaFB783__trnMCAU_tRNA	Met	CAT	59.3	Val	69.7	IPD:-2.10
Pteris_vittataFB390__trnMCAU_tRNA	Met	CAT	61.2	Val	70.8	IPD:-2.80
Salvinia_cucullata_MF177095_-_trnM-CAU_tRNA	Met	CAT	60	Val	66.3	IPD:-2.20
Sticherus_truncatus_FB735_-_trnM-CAU_tRNA	Met	CAT	59	Val	66.1	IPD:-0.10
Stromatopteris_moniliformis_St48_-_trnM-CAU_tRNA	Met	CAT	59	Val	66.1	IPD:-0.10
Tmesipteris_elongata_KJ569699_-_trnM-CAU_tRNA	Met	CAT	60.3	Val	70.6	IPD:-3.00
Trichomanes_galeottii-Tr08_-_trnM-CAU_tRNA	Met	CAT	63.4	Val	72.7	IPD:-5.20
Trichomanes_trollii_NC041122_-_trnM-CAU_tRNA	Met	CAT	53	Val	58	IPD:-2.00
Tryonia_myriophyllaMH173076__trnMCAU_tRNA	Met	CAT	62.1	Val	71.7	IPD:-3.60
Vandenboschia_auriculata_FB118_-_trnM-CAU_tRNA	Met	CAT	60.9	Val	70.9	IPD:-5.30
Vandenboschia_speciosa_NC041000_-_trnM-CAU_tRNA	Met	CAT	57.5	Val	69.8	IPD:-7.70
Vittaria_appalachianaMH173091__trnMCAU_tRNA	Met	CAT	52.2	Val	62.3	IPD:-1.20

## Sheet: trnV-UAC
Sequence Name	tRNA Type	Anticodon	Infernal Score	Isotype Model	Isotype Score	Note
Abrodictyum_obscurum_var_siamense_FB797_trnV-UAC_tRNA	Val	TAC	66.5	Ala	73.7	IPD:-5.90
Acrostichum_aureum_MT130571_trnV-UAC_tRNA	Val	TAC	66.5	Ala	73.7	IPD:-5.90
Adiantum_sinicum_MT130585_trnV-UAC_tRNA	Val	TAC	66.9	Val	76.2	None
Aleuritopteris_grevilleoides_MT130598_trnV-UAC_tRNA	Val	TAC	65.5	Ala	74.1	IPD:-7.20
Amborella_trichopodaNC005086_trnV-UAC_tRNA	Val	TAC	68.2	Ile	82.7	IPD:-10.30
Anemia_adiantifolia_An25_trnV-UAC_tRNA	Val	TAC	67	Ala	76.2	IPD:-8.30
Angiopteris_angustifolia_NC026300_trnV-UAC_tRNA	Val	TAC	66.1	Ala	75	IPD:-7.60
Anogramma_microphylla_MT130693_trnV-UAC_tRNA	Val	TAC	66.1	Ala	75	IPD:-7.60
Azolla_caroliniana_MF177093_trnV-UAC_tRNA	Val	TAC	67.1	Ala	74.6	IPD:-6.20
Blotiella_coursii_MT130655_trnV-UAC_tRNA	Val	TAC	65.5	Ala	74.1	IPD:-7.20
Botrychium_sp_KM817789_trnV-UAC_tRNA	Val	TAC	68.2	Ala	79.1	IPD:-13.70
Calciphilopteris_ludens_MT130590_trnV-UAC_tRNA	Val	TAC	65.5	Ala	74.1	IPD:-7.20
Ceratopteris_pteridoides_MT130583_trnV-UAC_tRNA	Val	TAC	67.8	Val	77.6	None
Cheiropleuria_bicuspis_wade3981_trnV-UAC_tRNA	Val	TAC	63.2	Ala	68.8	IPD:-8.40
Christensenia_aesculifolia_NC044756_trnV-UAC_tRNA	Val	TAC	64.9	Ala	69.9	IPD:-3.90
Coniogramme_petelotii_MT130619_trnV-UAC_tRNA	Val	TAC	66	Ala	76.6	IPD:-9.70
Crepidomanes_latealatum_FB547_trnV-UAC_tRNA	Val	TAC	65.2	Ile	72.3	IPD:-5.00
Cycas_revoluta_NC020319_trnV-UAC_tRNA	Val	TAC	59.8	Ile	73	IPD:-6.20
Dennstaedtia_scabra_MT130669_trnV-UAC_tRNA	Val	TAC	65.5	Ala	74.1	IPD:-7.20
Dicksonia_squarrosa_KJ569698_trnV-UAC_tRNA	Val	TAC	66	Ala	76.6	IPD:-9.70
Dicranopteris_ampla_FB304_trnV-UAC_tRNA	Val	TAC	67	Ala	76.2	IPD:-8.30
Doryopteris_concolor_MT130605_trnV-UAC_tRNA	Val	TAC	66.5	Ala	73.7	IPD:-5.90
Equisetum_arvense_NC014699_trnV-UAC_tRNA	Val	TAC	64.6	Ala	76.2	IPD:-12.60
Equisetum_hyemale_NC020146_trnV-UAC_tRNA	Val	TAC	64.1	Ala	73.5	IPD:-7.60
Hemionitis_arifolia_MT130558_trnV-UAC_tRNA	Val	TAC	65.5	Ala	74.1	IPD:-7.20
Histiopteris_incisa_MT130622_trnV-UAC_tRNA	Val	TAC	65.5	Ala	74.1	IPD:-7.20
Hymenophyllum_crassipetiolatum-Hy39_-_trnV-UAC_tRNA	Val	TAC	67	Ala	76.2	IPD:-8.30
Hymenophyllum_holochilum_NC039753_trnV-TAC_tRNA	Val	TAC	65.1	Ile	73.8	IPD:-7.00
Hymenophyllum_pallidum_Kuo2605_-_trnV-UAC_tRNA	Val	TAC	67	Ala	76.2	IPD:-8.30
Hypolepis_punctata_MT130616_trnV-UAC_tRNA	Val	TAC	65.5	Ala	74.1	IPD:-7.20
Llavea_cordifolia_NC040216_trnV-UAC_tRNA	Val	TAC	66	Ala	76.6	IPD:-9.70
Mankyua_chejuensis_NC017006_trnV-UAC_tRNA	Val	TAC	68.4	Ala	77.6	IPD:-11.70
Marsilea_crenata_KC536646_trnV-UAC_tRNA	Val	TAC	67.8	Ala	74.2	IPD:-6.00
Microlepia_obtusiloba_MT130570_trnV-UAC_tRNA	Val	TAC	65.5	Ala	74.1	IPD:-7.20
Monachosorum_henryi_MT130593_trnV-UAC_tRNA	Val	TAC	65.5	Ala	74.1	IPD:-7.20
Osmolindsaea_odorata_MT130576_trnV-UAC_tRNA	Val	TAC	63.7	Ala	71	IPD:-5.20
Paragymnopteris_vestita_MT130618_trnV-UAC_tRNA	Val	TAC	63.7	Ala	71	IPD:-5.20
Pityrogramma_calomelanos_MT130613_trnV-UAC_tRNA	Val	TAC	64.3	Ala	71.9	IPD:-5.50
Psilotum_nudum_NC003386_trnV-UAC_tRNA	Val	TAC	69.1	Ala	75.4	IPD:-6.60
Pteridium_aquilinum_NC014348_trnV-UAC_tRNA	Val	TAC	66	Ala	76.6	IPD:-9.70
Pteris_cretica_MT130556_trnV-UAC_tRNA	Val	TAC	65.5	Ala	74.1	IPD:-7.20
Salvinia_cucullata_MF177095_trnV-UAC_tRNA	Val	TAC	66.5	Ile	69.6	IPD:-4.80
Stromatopteris_moniliformis_St48_-_trnV-UAC_tRNA	Val	TAC	67	Ala	76.2	IPD:-8.30
Taenitis_blechnoides_MT130549_trnV-UAC_tRNA	Val	TAC	62.2	Ala	70.4	IPD:-7.30
Tapeinidium_gracile_Ta01_trnV-UAC_tRNA	Val	TAC	63.7	Ala	71	IPD:-5.20
Trichomanes_galeottiiTr08_trnV-UAC_tRNA	Val	TAC	64.6	Ile	70.8	IPD:-4.10
Vandenboschia_auriculata_FB118_trnV-UAC_tRNA	Val	TAC	67	Ala	70.5	IPD:-7.80
Vandenboschia_speciosa_NC041000_trnV-UAC_tRNA	Val	TAC	67	Ala	76.2	IPD:-8.30
